# Supplementary material for: Isolation and Characterization of Numerous Novel Phages Targeting Diverse Strains of the Ubiquitous and Opportunistic Pathogen Achromobacter xylosoxidans
Source: PubMed Central journal article supplement (PMC3899368; doi:10.1371/journal.pone.0086935), 2014-01-22
Supplement: pone.0086935.s004.pdf [file pone.0086935.s004.pdf]

Isolation of numerous novel phages targeting highly  
antibiotic resistant strains of the pathogen  
*Achromobacter xylosoxidans*  
Supplemental Material  
- Analysis of Phenotype Microarray Gen III plates -

Johannes Wittmann  
Leibniz Institute DSMZ

Brigitte Dreiseikelman  
University of Bielefeld

Christine Rohde  
Leibniz Institute DSMZ

Manfred Rohde  
Helmholtz Centre for  
Infection Research

Johannes Sikorski  
Leibniz Institute DSMZ

---

**Abstract**

This file describes the analysis of data from OmniLog® Phenotype MicroArray Gen III plates of *Achromobacter xylosoxidans* strains. The file consists of four main parts:

- Presentation of the data structure
- Heatmap analysis of "Area under the curve" (AUC) curve parameter values
- Principal Component Analysis
- Identification of physiological reactions that are significantly different between any of the *A. xylosoxidans* groups Ax1 to Ax6.

The R code is embedded.

This is the version of October 7, 2013.

*Keywords:* OmniLog® Phenotype MicroArray, heatmap, Principal Component Analysis, multiple comparison of groups.

---

This is a **Sweave** file (Leisch 2002). **Sweave** is a tool that allows to embed the R code for complete data analyses in L<sup>A</sup>T<sub>E</sub>X documents. The purpose is to create dynamic reports, which can be updated automatically if data or analysis change. Instead of inserting a prefabricated graph or table into the report, the master document contains the R code necessary to obtain it. When run through R, all data analysis output (tables, graphs, etc.) is created on the fly and inserted into a final latex document. The report can be automatically updated if data or analysis change, which allows for truly reproducible research.

For details to the code we refer to the tutorial and R manual of the **opm** package. All web resources regarding **opm** are linked on its main website <http://opm.dsmz.de/>. Strategies to analyse OmniLog® data are discussed in (Vaas, Sikorski, Michael, Göker, and Klenk 2012; Vaas, Sikorski, Hofner, Fiebig, Buddruhs, Klenk, and Göker 2013). For further details to the OmniLog® technology we refer to (Bochner, Gadzinski, and Panomitros 2001; Bochner

2009).

Load the necessary R.

```
R> # general
R> rm(list=ls(all=TRUE)) # removes all functions, libraries, data etc
R> # load packages
R> library(opm)
R> library(RColorBrewer)
R> pal <- brewer.pal(8,"Greens") # color palette from the brewer package
R> library(BiodiversityR)
R> library(vegan)
```

## 1. The data

The raw kinetic data of 121 Gen III microplates have been compiled into an OPMS object as described in the tutorial of the **opm** package (<http://opm.dsmz.de/>). The curve parameters have been aggregated using spline-fit algorithms as described (Vaas *et al.* 2013). Additional metadata were included to the dataset. The final dataset is loaded using the code below.

```
R> load("Achromobacter_SOM.RData")
```

Provide a brief overview on the associated metadata.

```
R> flat.achr <- flatten(achr[,1,"A01"],
                      include = list("city","country", "genus",
                                     "habitat","Isolator","replicate","species" ,
                                     "ssource","strain","year", "MLSTcluster"))
```

```
R> options(width=170)
R> flat.achr[, c(1:11)]
```

|    | city       | country | genus         | habitat       | Isolator         | replicate | species      | ssource       | strain     | year    | MLSTcluster |
|----|------------|---------|---------------|---------------|------------------|-----------|--------------|---------------|------------|---------|-------------|
| 1  | unknown    | Austria | Achromobacter | soil          | Streichsbier     | 3         | xylosoxidans | environmental | DSM11852   | 1991    | Ax_none     |
| 2  | unknown    | Austria | Achromobacter | soil          | Streichsbier     | 1         | xylosoxidans | environmental | DSM11852   | 1991    | Ax_none     |
| 3  | Wien       | Austria | Achromobacter | sputum        | H. Masoud        | 1         | xylosoxidans | medical       | CCUG 41513 | 1998    | Ax1         |
| 4  | Wien       | Austria | Achromobacter | sputum        | A. Makristathis  | 1         | xylosoxidans | medical       | CCUG 45179 | 2001    | Ax1         |
| 5  | Paris      | France  | Achromobacter | unknown       | Vieu und Binette | 1         | xylosoxidans | unknown       | 83-190     | 1983    | Ax6         |
| 6  | unknown    | Austria | Achromobacter | soil          | Streichsbier     | 2         | xylosoxidans | environmental | DSM11852   | 1991    | Ax_none     |
| 7  | Wien       | Austria | Achromobacter | sputum        | H. Masoud        | 2         | xylosoxidans | medical       | CCUG 41513 | 1998    | Ax1         |
| 8  | Wien       | Austria | Achromobacter | sputum        | A. Makristathis  | 2         | xylosoxidans | medical       | CCUG 45179 | 2001    | Ax1         |
| 9  | Paris      | France  | Achromobacter | unknown       | Vieu und Binette | 2         | xylosoxidans | unknown       | 83-190     | 1983    | Ax6         |
| 10 | Goeteborg  | Sweden  | Achromobacter | ear discharge | unknown          | 1         | xylosoxidans | medical       | CCUG 1142  | 1971    | Ax1         |
| 11 | Lyon       | France  | Achromobacter | water         | J. Fleurette     | 1         | xylosoxidans | environmental | CCUG 14603 | 1983    | Ax1         |
| 12 | Lyon       | France  | Achromobacter | nosocomial    | J. Fleurette     | 1         | xylosoxidans | medical       | CCUG 14608 | 1983    | Ax1         |
| 13 | unknown    | Germany | Achromobacter | wound         | unknown          | 1         | xylosoxidans | medical       | CCUG 2160  | unknown | Ax6         |
| 14 | Goeteborg  | Sweden  | Achromobacter | ear discharge | unknown          | 1         | xylosoxidans | medical       | CCUG 2203  | 1973    | Ax4         |
| 15 | Manchester | England | Achromobacter | blood         | unknown          | 1         | ruhlandii    | medical       | CCUG 2349  | 1950    | Ax5         |
| 16 | unknown    | unknown | Achromobacter | unknown       | F. Pichinoty     | 1         | xylosoxidans | unknown       | CCM 2981   | unknown | Ax1         |
| 17 | unknown    | unknown | Achromobacter | unknown       | F. Pichinoty     | 1         | xylosoxidans | unknown       | CCM 2982   | unknown | Ax1         |
| 18 | Goeteborg  | Sweden  | Achromobacter | urine         | unknown          | 1         | xylosoxidans | medical       | CCUG 42034 | 1999    | Ax6         |
| 19 | Goeteborg  | Sweden  | Achromobacter | sputum        | unknown          | 1         | xylosoxidans | medical       | CCUG 42363 | 1999    | Ax1         |
| 20 | Goeteborg  | Sweden  | Achromobacter | sputum        | unknown          | 1         | xylosoxidans | medical       | CCUG 47074 | 2002    | Ax2         |
| 21 | Dublin     | Ireland | Achromobacter | unknown       | unknown          | 1         | xylosoxidans | medical       | CCUG 47723 | 2003    | Ax6         |
| 22 | Goeteborg  | Sweden  | Achromobacter | sputum        | B. Joensson      | 1         | xylosoxidans | medical       | CCUG 48331 | 2003    | Ax1         |
| 23 | Goeteborg  | Sweden  | Achromobacter | sputum        | Lena Lind        | 1         | xylosoxidans | medical       | CCUG 48684 | 2004    | Ax1         |
| 24 | Goeteborg  | Sweden  | Achromobacter | sputum        | unknown          | 1         | xylosoxidans | medical       | CCUG 53197 | 2006    | Ax1         |
| 25 | Goeteborg  | Sweden  | Achromobacter | eye           | unknown          | 1         | xylosoxidans | medical       | CCUG 54610 | 2007    | Ax3         |
| 26 | Goeteborg  | Sweden  | Achromobacter | sputum        | Adlerberth       | 1         | xylosoxidans | medical       | CCUG 56600 | 2008    | Ax1         |
| 27 | Goeteborg  | Sweden  | Achromobacter | sputum        | unknown          | 1         | xylosoxidans | medical       | CCUG 57172 | 2008    | Ax1         |
| 28 | Goeteborg  | Sweden  | Achromobacter | sputum        | unknown          | 1         | xylosoxidans | medical       | CCUG 59527 | 2010    | Ax2         |
| 29 | Goeteborg  | Sweden  | Achromobacter | blood         | unknown          | 1         | xylosoxidans | medical       | CCUG 61615 | 2011    | Ax2         |
| 30 | Goeteborg  | Sweden  | Achromobacter | ear discharge | unknown          | 2         | xylosoxidans | medical       | CCUG 1142  | 1971    | Ax1         |
| 31 | Lyon       | France  | Achromobacter | water         | J. Fleurette     | 2         | xylosoxidans | environmental | CCUG 14603 | 1983    | Ax1         |
| 32 | Lyon       | France  | Achromobacter | nosocomial    | J. Fleurette     | 2         | xylosoxidans | medical       | CCUG 14608 | 1983    | Ax1         |
| 33 | unknown    | Germany | Achromobacter | wound         | unknown          | 2         | xylosoxidans | medical       | CCUG 2160  | unknown | Ax6         |
| 34 | Goeteborg  | Sweden  | Achromobacter | ear discharge | unknown          | 2         | xylosoxidans | medical       | CCUG 2203  | 1973    | Ax4         |
| 35 | Manchester | England | Achromobacter | blood         | unknown          | 2         | ruhlandii    | medical       | CCUG 2349  | 1950    | Ax5         |
| 36 | unknown    | unknown | Achromobacter | unknown       | F. Pichinoty     | 2         | xylosoxidans | unknown       | CCM 2981   | unknown | Ax1         |
| 37 | unknown    | unknown | Achromobacter | unknown       | F. Pichinoty     | 2         | xylosoxidans | unknown       | CCM 2982   | unknown | Ax1         |
| 38 | Goeteborg  | Sweden  | Achromobacter | urine         | unknown          | 2         | xylosoxidans | medical       | CCUG 42034 | 1999    | Ax6         |

|     |            |             |               |               |                  |   |               |               |            |         |         |
|-----|------------|-------------|---------------|---------------|------------------|---|---------------|---------------|------------|---------|---------|
| 39  | Goeteborg  | Sweden      | Achromobacter | sputum        | unknown          | 2 | xylosoxidans  | medical       | CCUG 42363 | 1999    | Ax1     |
| 40  | Goeteborg  | Sweden      | Achromobacter | sputum        | unknown          | 2 | xylosoxidans  | medical       | CCUG 47074 | 2002    | Ax2     |
| 41  | Dublin     | Ireland     | Achromobacter | unknown       | unknown          | 2 | sp            | medical       | CCUG 47723 | 2003    | Ax6     |
| 42  | Goeteborg  | Sweden      | Achromobacter | sputum        | B. Joensson      | 2 | xylosoxidans  | medical       | CCUG 48331 | 2003    | Ax1     |
| 43  | Goeteborg  | Sweden      | Achromobacter | sputum        | Lena Lind        | 2 | xylosoxidans  | medical       | CCUG 48684 | 2004    | Ax1     |
| 44  | Goeteborg  | Sweden      | Achromobacter | sputum        | unknown          | 2 | xylosoxidans  | medical       | CCUG 53197 | 2006    | Ax1     |
| 45  | Goeteborg  | Sweden      | Achromobacter | eye           | unknown          | 2 | xylosoxidans  | medical       | CCUG 54610 | 2007    | Ax3     |
| 46  | Goeteborg  | Sweden      | Achromobacter | sputum        | Adlerberth       | 2 | xylosoxidans  | medical       | CCUG 56600 | 2008    | Ax1     |
| 47  | Goeteborg  | Sweden      | Achromobacter | sputum        | unknown          | 2 | xylosoxidans  | medical       | CCUG 57172 | 2008    | Ax1     |
| 48  | Goeteborg  | Sweden      | Achromobacter | sputum        | unknown          | 2 | xylosoxidans  | medical       | CCUG 59527 | 2010    | Ax2     |
| 49  | Goeteborg  | Sweden      | Achromobacter | blood         | unknown          | 2 | xylosoxidans  | medical       | CCUG 61615 | 2011    | Ax2     |
| 50  | Goeteborg  | Sweden      | Achromobacter | blood         | unknown          | 1 | xylosoxidans  | medical       | CCUG 11894 | 1982    | Ax6     |
| 51  | unknown    | Spain       | Achromobacter | spinal fluid  | unknown          | 1 | xylosoxidans  | medical       | CCUG 1205  | 1970    | Ax1     |
| 52  | Goeteborg  | Sweden      | Achromobacter | ear discharge | unknown          | 1 | xylosoxidans  | medical       | CCUG 1668  | 1972    | Ax1     |
| 53  | unknown    | unknown     | Achromobacter | unknown       | unknown          | 1 | xylosoxidans  | unknown       | CCUG 1869  | 1972    | Ax1     |
| 54  | unknown    | Japan       | Achromobacter | ear discharge | Eiko Yabuuchi    | 1 | xylosoxidans  | medical       | DSM2402    | unknown | Ax_none |
| 55  | Stockholm  | Sweden      | Achromobacter | unknown       | unknown          | 1 | denitrificans | unknown       | CCUG 27767 | 1991    | Ax_none |
| 56  | unknown    | France      | Achromobacter | urine         | F. Pichinoty     | 1 | xylosoxidans  | medical       | CCM 2983   | unknown | Ax1     |
| 57  | Falun      | Sweden      | Achromobacter | sputum        | unknown          | 1 | xylosoxidans  | medical       | CCUG 33068 | 1994    | Ax1     |
| 58  | Copenhagen | Denmark     | Achromobacter | unknown       | unknown          | 1 | xylosoxidans  | unknown       | CCUG 367   | 1964    | Ax4     |
| 59  | Goeteborg  | Sweden      | Achromobacter | sputum        | unknown          | 1 | xylosoxidans  | medical       | CCUG 44552 | 2000    | Ax1     |
| 60  | Goeteborg  | Sweden      | Achromobacter | sputum        | B. Joensson      | 1 | xylosoxidans  | medical       | CCUG 48135 | 2003    | Ax2     |
| 61  | Goeteborg  | Sweden      | Achromobacter | sputum        | C. Ahren         | 1 | xylosoxidans  | medical       | CCUG 48386 | 2003    | Ax2     |
| 62  | Goeteborg  | Sweden      | Achromobacter | sputum        | C. Wenneras      | 1 | xylosoxidans  | medical       | CCUG 48584 | 2003    | Ax1     |
| 63  | unknown    | Sweden      | Achromobacter | unknown       | unknown          | 1 | xylosoxidans  | environmental | CCUG 52128 | 2005    | Ax3     |
| 64  | Goeteborg  | Sweden      | Achromobacter | sputum        | unknown          | 1 | xylosoxidans  | medical       | CCUG 53665 | 2006    | Ax1     |
| 65  | Goeteborg  | Sweden      | Achromobacter | sputum        | unknown          | 1 | xylosoxidans  | medical       | CCUG 56295 | 2008    | Ax_none |
| 66  | Goeteborg  | Sweden      | Achromobacter | trachea       | unknown          | 1 | xylosoxidans  | medical       | CCUG 59837 | 2010    | Ax1     |
| 67  | Goettingen | Germany     | Achromobacter | unknown       | Nagel            | 1 | xylosoxidans  | unknown       | DSM6388    | unknown | Ax2     |
| 68  | Goeteborg  | Sweden      | Achromobacter | unknown       | unknown          | 1 | xylosoxidans  | unknown       | CCUG 716   | 1970    | Ax1     |
| 69  | Paris      | France      | Achromobacter | unknown       | unknown          | 1 | xylosoxidans  | unknown       | CCUG 723   | 1961    | Ax1     |
| 70  | Goeteborg  | Sweden      | Achromobacter | blood         | unknown          | 2 | xylosoxidans  | medical       | CCUG 11894 | 1982    | Ax6     |
| 71  | unknown    | Spain       | Achromobacter | spinal fluid  | unknown          | 2 | xylosoxidans  | medical       | CCUG 1205  | 1970    | Ax1     |
| 72  | Lyon       | France      | Achromobacter | water         | J. Fleurette     | 2 | xylosoxidans  | environmental | CCUG 14603 | 1983    | Ax1     |
| 73  | Goeteborg  | Sweden      | Achromobacter | ear discharge | unknown          | 2 | xylosoxidans  | medical       | CCUG 1668  | 1972    | Ax1     |
| 74  | unknown    | unknown     | Achromobacter | unknown       | unknown          | 2 | xylosoxidans  | unknown       | CCUG 1869  | 1972    | Ax1     |
| 75  | Stockholm  | Sweden      | Achromobacter | unknown       | unknown          | 2 | denitrificans | unknown       | CCUG 27767 | 1991    | Ax_none |
| 76  | unknown    | France      | Achromobacter | urine         | F. Pichinoty     | 2 | xylosoxidans  | medical       | CCM 2983   | unknown | Ax1     |
| 77  | Falun      | Sweden      | Achromobacter | sputum        | unknown          | 2 | xylosoxidans  | medical       | CCUG 33068 | 1994    | Ax1     |
| 78  | Copenhagen | Denmark     | Achromobacter | unknown       | unknown          | 2 | xylosoxidans  | unknown       | CCUG 367   | 1964    | Ax4     |
| 79  | Goeteborg  | Sweden      | Achromobacter | sputum        | unknown          | 2 | xylosoxidans  | medical       | CCUG 44552 | 2000    | Ax1     |
| 80  | Goeteborg  | Sweden      | Achromobacter | sputum        | B. Joensson      | 2 | xylosoxidans  | medical       | CCUG 48135 | 2003    | Ax2     |
| 81  | Goeteborg  | Sweden      | Achromobacter | sputum        | C. Ahren         | 2 | xylosoxidans  | medical       | CCUG 48386 | 2003    | Ax2     |
| 82  | Goeteborg  | Sweden      | Achromobacter | sputum        | C. Wenneras      | 2 | xylosoxidans  | medical       | CCUG 48584 | 2003    | Ax1     |
| 83  | unknown    | Sweden      | Achromobacter | unknown       | unknown          | 2 | xylosoxidans  | environmental | CCUG 52128 | 2005    | Ax3     |
| 84  | Goeteborg  | Sweden      | Achromobacter | sputum        | unknown          | 2 | xylosoxidans  | medical       | CCUG 53665 | 2006    | Ax1     |
| 85  | Goeteborg  | Sweden      | Achromobacter | sputum        | unknown          | 2 | xylosoxidans  | medical       | CCUG 56295 | 2008    | Ax_none |
| 86  | Goeteborg  | Sweden      | Achromobacter | trachea       | unknown          | 2 | xylosoxidans  | medical       | CCUG 59837 | 2010    | Ax1     |
| 87  | Goettingen | Germany     | Achromobacter | unknown       | Nagel            | 2 | xylosoxidans  | unknown       | DSM6388    | unknown | Ax2     |
| 88  | Goeteborg  | Sweden      | Achromobacter | unknown       | unknown          | 2 | xylosoxidans  | unknown       | CCUG 716   | 1970    | Ax1     |
| 89  | Paris      | France      | Achromobacter | unknown       | unknown          | 2 | xylosoxidans  | unknown       | CCUG 723   | 1961    | Ax1     |
| 90  | unknown    | Denmark     | Achromobacter | spinal fluid  | unknown          | 1 | xylosoxidans  | medical       | LMG 1862   | unknown | Ax1     |
| 91  | unknown    | Japan       | Achromobacter | ear discharge | E. Yabuuchi      | 1 | ruhländii     | medical       | LMG 1864   | unknown | Ax4     |
| 92  | unknown    | Japan       | Achromobacter | soil          | Iwasaki and Mori | 1 | xylosoxidans  | environmental | LMG 1865   | unknown | Ax1     |
| 93  | Jalajala   | Philippines | Achromobacter | unknown       | B.Cottyn         | 1 | xylosoxidans  | environmental | LMG 20155  | unknown | Ax4     |
| 94  | unknown    | France      | Achromobacter | blood         | unknown          | 1 | ruhländii     | medical       | LMG 3328   | unknown | Ax4     |
| 95  | unknown    | unknown     | Achromobacter | unknown       | unknown          | 1 | denitrificans | unknown       | LMG 3414   | unknown | Ax1     |
| 96  | unknown    | Japan       | Achromobacter | ear discharge | E. Yabuuchi      | 1 | xylosoxidans  | medical       | LMG 3420   | unknown | Ax1     |
| 97  | unknown    | France      | Achromobacter | sputum        | unknown          | 1 | xylosoxidans  | medical       | LMG 3440   | unknown | Ax1     |
| 98  | unknown    | Denmark     | Achromobacter | ear discharge | H. Lautrop       | 1 | xylosoxidans  | medical       | LMG 3461   | unknown | Ax1     |
| 99  | unknown    | Denmark     | Achromobacter | spinal fluid  | H. Lautrop       | 1 | xylosoxidans  | medical       | LMG 3463   | unknown | Ax1     |
| 100 | unknown    | Denmark     | Achromobacter | water         | H. Lautrop       | 1 | xylosoxidans  | environmental | LMG 3464   | unknown | Ax1     |
| 101 | unknown    | Denmark     | Achromobacter | water         | H. Lautrop       | 1 | xylosoxidans  | environmental | LMG 3465   | unknown | Ax1     |
| 102 | unknown    | Denmark     | Achromobacter | unknown       | H. Lautrop       | 1 | xylosoxidans  | medical       | LMG 3466   | unknown | Ax1     |
| 103 | unknown    | Wales       | Achromobacter | blood         | unknown          | 1 | xylosoxidans  | medical       | LMG 7050   | unknown | Ax5     |
| 104 | unknown    | England     | Achromobacter | blood         | unknown          | 1 | xylosoxidans  | medical       | LMG 7051   | unknown | Ax5     |
| 105 | unknown    | England     | Achromobacter | sputum        | unknown          | 1 | xylosoxidans  | medical       | LMG 7052   | unknown | Ax1     |
| 106 | unknown    | Scotland    | Achromobacter | wound         | unknown          | 1 | xylosoxidans  | medical       | LMG 7053   | unknown | Ax4     |
| 107 | unknown    | England     | Achromobacter | unknown       | unknown          | 1 | xylosoxidans  | environmental | LMG 7054   | unknown | Ax2     |
| 108 | unknown    | Japan       | Achromobacter | ear discharge | Eiko Yabuuchi    | 1 | xylosoxidans  | medical       | DSM2402    | unknown | Ax_none |
| 109 | unknown    | France      | Achromobacter | urine         | F. Pichinoty     | 2 | xylosoxidans  | medical       | CCM 2983   | unknown | Ax1     |
| 110 | unknown    | Denmark     | Achromobacter | spinal fluid  | unknown          | 2 | xylosoxidans  | medical       | LMG 1862   | unknown | Ax1     |
| 111 | unknown    | Japan       | Achromobacter | ear discharge | E. Yabuuchi      | 2 | ruhländii     | medical       | LMG 1864   | unknown | Ax4     |
| 112 | unknown    | Japan       | Achromobacter | soil          | Iwasaki and Mori | 2 | xylosoxidans  | environmental | LMG 1865   | unknown | Ax1     |
| 113 | Jalajala   | Philippines | Achromobacter | unknown       | B.Cottyn         | 2 | xylosoxidans  | environmental | LMG 20155  | unknown | Ax4     |
| 114 | unknown    | France      | Achromobacter | blood         | unknown          | 2 | ruhländii     | medical       | LMG 3328   | unknown | Ax4     |
| 115 | unknown    | unknown     | Achromobacter | unknown       | unknown          | 2 | denitrificans | unknown       | LMG 3414   | unknown | Ax1     |
| 116 | unknown    | Japan       | Achromobacter | ear discharge | E. Yabuuchi      | 2 | xylosoxidans  | medical       | LMG 3420   | unknown | Ax1     |
| 117 | unknown    | France      | Achromobacter | sputum        | unknown          | 2 | xylosoxidans  | medical       | LMG 3440   | unknown | Ax1     |
| 118 | unknown    | Denmark     | Achromobacter | ear discharge | H. Lautrop       | 2 | xylosoxidans  | medical       | LMG 3461   | unknown | Ax1     |
| 119 | unknown    | Denmark     | Achromobacter | spinal fluid  | H. Lautrop       | 2 | xylosoxidans  | medical       | LMG 3463   | unknown | Ax1     |
| 120 | unknown    | Denmark     | Achromobacter | water         | H. Lautrop       | 2 | xylosoxidans  | environmental | LMG 3464   | unknown | Ax1     |
| 121 | unknown    | Denmark     | Achromobacter | water         | H. Lautrop       | 2 | xylosoxidans  | environmental | LMG 3465   | unknown | Ax1     |
| 122 | unknown    | Denmark     | Achromobacter | unknown       | H. Lautrop       | 2 | xylosoxidans  | medical       | LMG 3466   | unknown | Ax1     |
| 123 | unknown    | Wales       | Achromobacter | blood         | unknown          | 2 | xylosoxidans  | medical       | LMG 7050   | unknown | Ax5     |
| 124 | unknown    | England     | Achromobacter | blood         | unknown          | 2 | xylosoxidans  | medical       | LMG 7051   | unknown | Ax5     |
| 125 | unknown    | England     | Achromobacter | sputum        | unknown          | 2 | xylosoxidans  | medical       | LMG 7052   | unknown | Ax1     |
| 126 | unknown    | Scotland    | Achromobacter | wound         | unknown          | 2 | xylosoxidans  | medical       | LMG 7053   | unknown | Ax4     |
| 127 | unknown    | England     | Achromobacter | unknown       | unknown          | 2 | xylosoxidans  | environmental | LMG 7054   | unknown | Ax2     |

## 2. Heatmap on AUC values

The curve kinetics will be analysed using the curve parameter "Area under the curve" (AUC). A heatmap analysis allows to cluster strains according to similar physiological reactions across all 96 wells. Similarly, wells are clustered according to similarities across all strains.

The code below shows Figure 1.

```
R> heat_map(achromobacter,
            as.labels = list("strain", "replicate", "MLSTcluster"), # labels of the rows
            as.groups = "MLSTcluster", # colors the rowside dendrogram
            cexRow = 0.5, # set the size of the row labels
            use.fun = "gplots",
            main = "Heatmap on AUC data",
            subset = "AUC",
            r.col = c("white", "palegreen1", "khaki1", "grey74",
                    "lightblue1", "lightpink", "lightsalmon1"),
            col = pal,
            xlab = "Well substrates on GenIII Biolog plate",
            ylab = "strains, replicates, and their MLST cluster affiliation")
```

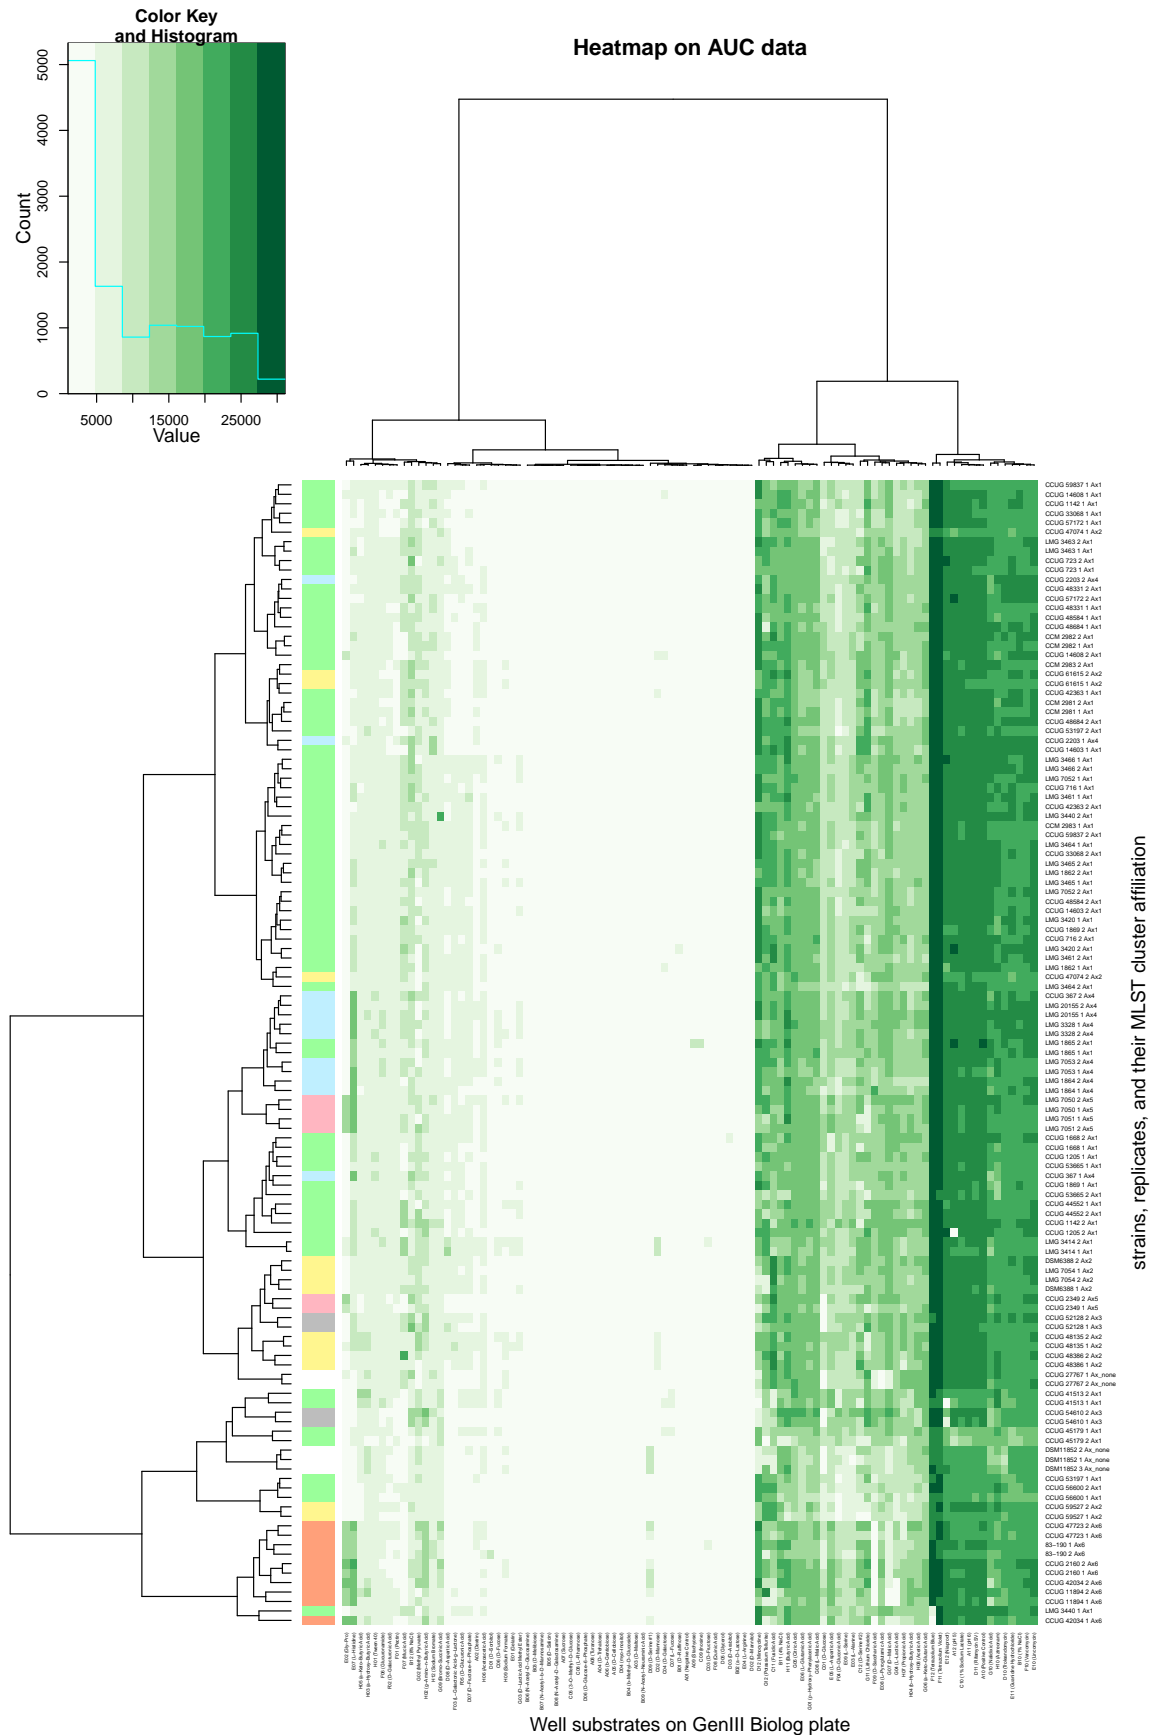

Figure 1: Gen III heatmap of the curve parameter “AUC”, which is the area under the curve. The row dendrogram color follows MLST cluster designation (see also the last entry in the row labels). The dendrograms are created using ward clustering on euclidian distances.

### 3. Principal Component Analysis of GenIII plates

Principal Component Analysis (PCA) is a mathematical procedure that uses orthogonal transformation to convert a set of observations of possibly correlated variables into a set of values of linearly uncorrelated variables called principal components ([http://en.wikipedia.org/wiki/Principal\\_component\\_analysis](http://en.wikipedia.org/wiki/Principal_component_analysis), access on October 7, 2013). The idea is to detect and plot only the actually existing relationships between the variables. More technical and mathematically precise definitions are given in (Legendre and Legendre 1998).

Load custom principal component analysis function. This function makes use of the R packages **vegan** and **BiodiversityR**.

```
R> custom_pca <- function(x, legend = FALSE, lwd = 2, text.col = "darkgrey",
  arrow.col = "red", cex = 0.4, scaling = 1, circle = scaling == 1,
  pre.sym.col = if (symbols)
    "white" # avoid plotting ordisymbol() symbols over biplot() symbols
  else
    "black", symbols = TRUE, ...) {
  pca <- vegan::rda(x)
  #print(summary(pca)[6])
  pca.plot <- biplot(x = pca, scaling = scaling,
    col = c(pre.sym.col, arrow.col), ...)
  if (symbols)
    BiodiversityR::ordisymbol(pca.plot,
      data.frame(.N = if (is.null(attr(x, "row.groups")))
        rownames(x)
      else
        attr(x, "row.groups")), ".N", legend = legend, lwd = lwd)
  text(pca.plot, "species", col = text.col, cex = cex)
  if (circle)
    BiodiversityR::ordiequilibriumcircle(pca, pca.plot)
  invisible(pca)
}
```

Prepare a data matrix for a principal component analysis based on curve parameter "AUC".

```
R> x <- opm::extract(achromobacter, as.labels = list("strain", "replicate", "MLSTcluster"),
  as.groups = list("MLSTcluster"), subset = "AUC")
```

The code below shows the pca ordination Figure 2.

```
R> custom_pca(x, legend = TRUE, cex = 0.3, text.col = "grey")
```

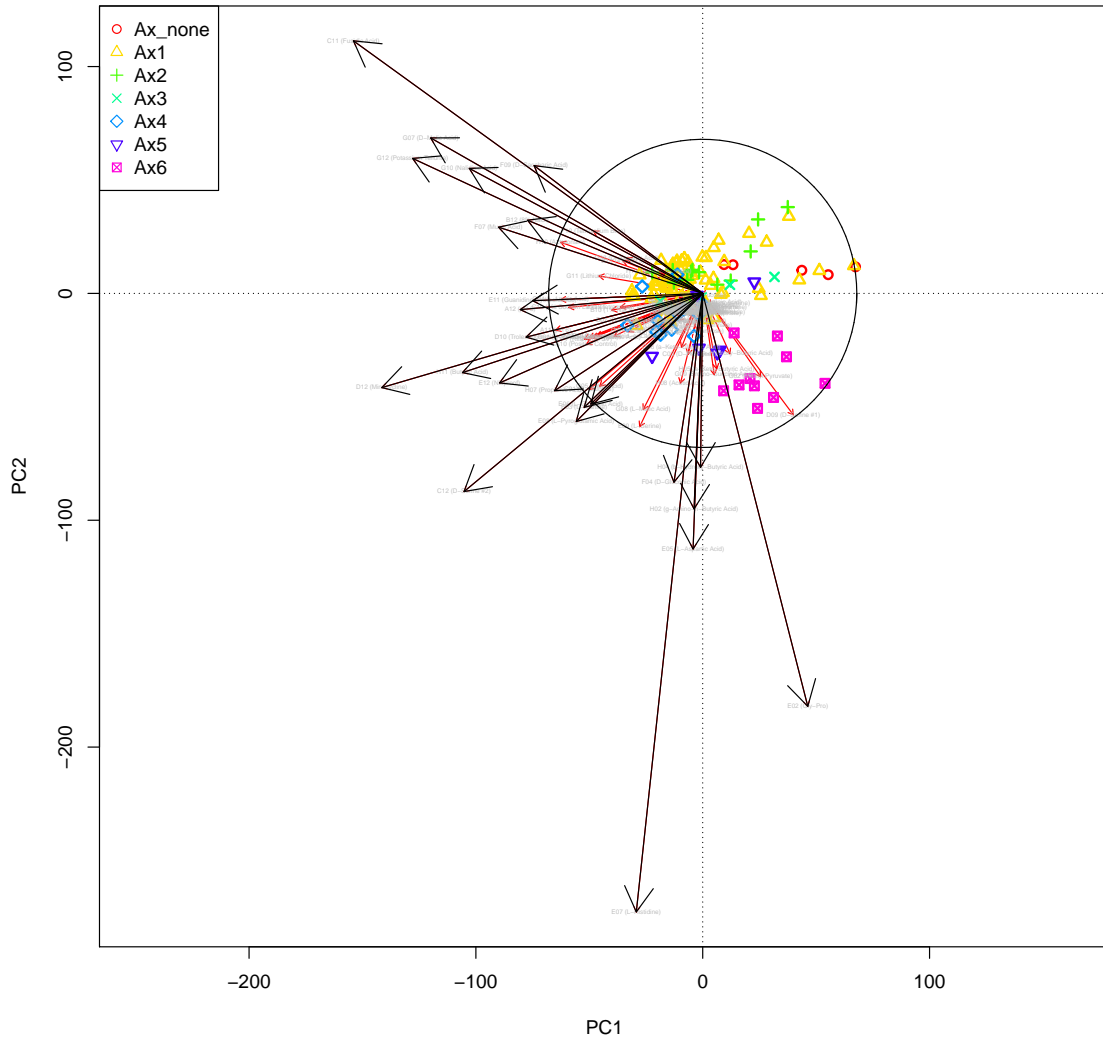

Figure 2: Biplot graphical representation of a principal component analysis of curve parameter "AUC" values as shown in the heatmap of Figure 1. The axes PC1 and PC2 display 24.1% and 13.9% of the total variance, respectively. Function `ordiequilibriumcircle()` produces a *circle of equilibrium contribution*. Its radius is equal to  $\sqrt{d/p}$ , where  $d$  is the number of axes represented in the biplot (usually  $d = 2$ ) and  $p$  is the number of dimensions of the PCA space (i.e. usually the number of variables of the data matrix, here with  $N = 96$ ). The radius of this circle represents the length of the vector representing a variable that would contribute equally to all the dimensions of the PCA space. Therefore, for any given pair of axes, the variables that have vectors longer than this radius (in black color) make a higher contribution than average and can be interpreted with confidence (Borcard *et al.* 2011), whereas variables that are not informative are represented by red vectors. The figure demonstrates that numerous physiological reactions (represented by the wells) contribute to the PCA space. In general, strains of individual groups Ax1 to Ax2 occupy similar positions in the PCA place, which supports the results from the heatmap analysis (Figure 1).

## 4. Multiple Comparison per Well

A further research task is to identify whether among any of the six phylogenetically defined groups Ax1 to Ax6 of *A. xylosoxidans* (see Fig. 1 of the main manuscript) significant differences in the AUC values of any of the 96 wells are. A “Tukey”-type of comparison (all-against-all) of the groups Ax1 to Ax6 would result in 15 pairwise comparisons. Hence, this results in 15 statistical hypotheses that are tested simultaneously. If an increasing number of hypotheses is tested, with the number of true hypotheses unknown, the probability of at least one wrong testing decision also increases. That is, conclusions on significant differences between a pair of groups are increasingly likely to be wrong. Thus the so-called family-wise error-rate (or False Discovery Rate), which is essentially the probability of at least one false rejection among all the null hypotheses, needs to be controlled. The function `opm_mcp()` applies functionality from the **multcomp** package which has appropriate control of the family-wise error-rate implemented ((Hothorn, Bretz, and Westfall 2008; Herberich, Sikorski, and Hothorn 2010)).

Therefore, in order to identify between which of the six Ax groups (see Figure 1 of the main text) a significant difference exists, a multiple comparison of Ax groups per well is performed using `multcomp` algorithms ((Hothorn *et al.* 2008; Herberich *et al.* 2010)).

Prepare the data set for application of `opm_mcp()` per well. Remove the Ax\_none strains.

```
R>achr1 <- subset(achromobacter, query = list(MLSTcluster = "Ax_none"), invert = TRUE)
R>allpvalues <- c()
R>allsubstrate <- c()
R>allestimate <- c()
R>allstrains <- c()
R>specificWell <- opm_mcp(achr1[,,"H02"], model = ~ MLSTcluster,
                        m.type = "aov", linfct = c(Tukey = 1), subset = "AUC")
R>plot(specificWell)
R>strains <- as.vector(row.names(as.data.frame(summary(specificWell)[2])))
```

Perform a multiple comparison among all Ax clusters for each well. These are 15 pairwise comparisons. The comparison is done on the curve parameter "AUC".

```
R>for(i in 1:96){
  specificWell <- opm_mcp(achr1[, ,i], model = ~ MLSTcluster,
                        m.type = "aov", linfct = c(Tukey = 1), subset = "AUC")

  # summarize the statistics
  pvalues <- as.vector(unlist(unlist(summary(specificWell)[10])[48:62]))
  estimate <- as.vector(unlist(unlist(summary(specificWell)[10])[3:17]))
  substrate <- rep(wells(achr1[, ,i], full = TRUE), 15)
  allpvalues <- c(allpvalues, pvalues)
  allestimate <- c(allestimate, estimate)
  allstrains <- c(allstrains, strains)
  allsubstrate <- c(allsubstrate, substrate)
}
R>sumpvalues <- data.frame(allstrains, allpvalues,allsubstrate, allestimate)
R>sumpvalues[1276:1290,1:4]
R>sumpvalues$significant.pvalues <- sumpvalues$allpvalues < 0.05
R>sumpvalues$strainA.is.larger.than.strainB <- sumpvalues$allestimate > 0
R>sumpvalues$SIGN <- subset(sumpvalues, significant.pvalues == TRUE)
R>sumpvalues$SIGN$allsubstrate <- factor(sumpvalues$SIGN$allsubstrate)
R>colnames(sumpvalues$SIGN)[1] <- "comparison"
R>colnames(sumpvalues$SIGN)[2] <- "p value"
R>colnames(sumpvalues$SIGN)[3] <- "well and substrate"
R>colnames(sumpvalues$SIGN)[4] <- "difference between AUC means"
```



In which carbon sources is there at least one significant difference between any of the groups Ax1 to Ax6?

```
R> options(width = 80)
R> levels(as.factor(sumpvaluesSIGN[, 3]))

[1] "B02 (a-D-Lactose)"           "B12 (8% NaCl)"
[3] "C01 (D-Glucose)"             "C05 (3-O-Methyl-D-Glucose)"
[5] "C10 (1% Sodium Lactate)"     "C11 (Fusidic Acid)"
[7] "D07 (D-Fructose-6-Phosphate)" "D08 (D-Aspartic Acid)"
[9] "D09 (D-Serine)"              "D12 (Minocycline)"
[11] "E02 (Gly-Pro)"               "E03 (L-Alanine)"
[13] "E05 (L-Aspartic Acid)"       "E06 (L-Glutamic Acid)"
[15] "E07 (L-Histidine)"           "E09 (L-Serine)"
[17] "E11 (Guanidine Hydrochloride)" "E12 (Niaproof)"
[19] "F01 (Pectin)"                "F02 (D-Galacturonic Acid)"
[21] "F03 (L-Galactonic Acid-g-Lactone)" "F04 (D-Gluconic Acid)"
[23] "F05 (D-Glucuronic Acid)"     "F06 (Glucuronamide)"
[25] "F07 (Mucic Acid)"           "F09 (D-Saccharic Acid)"
[27] "F11 (Tetrazolium Violet)"    "G03 (D-Lactic Acid Methyl Ester)"
[29] "G04 (L-Lactic Acid)"         "G07 (D-Malic Acid)"
[31] "G09 (Bromo-Succinic Acid)"   "G10 (Nalidixic Acid)"
[33] "G11 (Lithium Chloride)"      "G12 (Potassium Tellurite)"
[35] "H01 (Tween 40)"              "H02 (g-Amino-n-Butyric Acid)"
[37] "H04 (b-Hydroxy-Butyric Acid)" "H10 (Aztreonam)"
```

List all the significant pairwise comparisons.

```
R> options(width = 150)
R> sumpvaluesSIGN[, 1:4]

      comparison      p value      well and substrate difference between AUC means
198  Ax4 - Ax1 2.923198e-02      B02 (a-D-Lactose) 329.9635
347  Ax3 - Ax1 9.024754e-05      B12 (8% NaCl) 6043.7674
350  Ax6 - Ax1 7.106421e-03      B12 (8% NaCl) -2968.0389
351  Ax3 - Ax2 1.109162e-04      B12 (8% NaCl) 6617.2634
355  Ax4 - Ax3 1.796867e-02      B12 (8% NaCl) -4651.6250
356  Ax5 - Ax3 3.520502e-04      B12 (8% NaCl) -7050.6563
357  Ax6 - Ax3 1.603838e-07      B12 (8% NaCl) -9011.8063
359  Ax6 - Ax4 1.029595e-03      B12 (8% NaCl) -4360.1812
362  Ax3 - Ax1 2.740308e-11      C01 (D-Glucose) -7719.5035
366  Ax3 - Ax2 5.076765e-07      C01 (D-Glucose) -6838.6161
370  Ax4 - Ax3 7.876512e-10      C01 (D-Glucose) 7964.6563
371  Ax5 - Ax3 6.157215e-05      C01 (D-Glucose) 6105.9375
372  Ax6 - Ax3 5.841532e-06      C01 (D-Glucose) 6220.6750
430  Ax4 - Ax3 9.317752e-03      C05 (3-O-Methyl-D-Glucose) 897.1146
509  Ax6 - Ax4 2.099306e-02      C10 (1% Sodium Lactate) -2209.8812
511  Ax2 - Ax1 2.624268e-03      C11 (Fusidic Acid) 4059.9777
515  Ax6 - Ax1 2.566049e-06      C11 (Fusidic Acid) -6928.9187
516  Ax3 - Ax2 1.436754e-02      C11 (Fusidic Acid) -6808.3214
519  Ax6 - Ax2 1.721625e-10      C11 (Fusidic Acid) -10988.8964
524  Ax6 - Ax4 7.321234e-05      C11 (Fusidic Acid) -7376.3667
525  Ax6 - Ax5 2.498316e-03      C11 (Fusidic Acid) -7190.7208
635  Ax6 - Ax1 1.915129e-02      D07 (D-Fructose-6-Phosphate) -1194.0969
644  Ax6 - Ax4 2.143343e-03      D07 (D-Fructose-6-Phosphate) -1836.6958
650  Ax6 - Ax1 3.185582e-05      D08 (D-Aspartic Acid) -3151.1521
654  Ax6 - Ax2 1.071763e-03      D08 (D-Aspartic Acid) -3146.9661
657  Ax6 - Ax3 4.562262e-02      D08 (D-Aspartic Acid) -3195.7562
665  Ax6 - Ax1 0.000000e+00      D09 (D-Serine) 4292.0667
669  Ax6 - Ax2 0.000000e+00      D09 (D-Serine) 4378.7482
672  Ax6 - Ax3 1.265654e-14      D09 (D-Serine) 4494.7125
674  Ax6 - Ax4 0.000000e+00      D09 (D-Serine) 4145.6396
675  Ax6 - Ax5 2.220446e-16      D09 (D-Serine) 4290.9208
```

|      |           |              |                                   |             |
|------|-----------|--------------|-----------------------------------|-------------|
| 706  | Ax2 - Ax1 | 1.141524e-06 | D12 (Minocycline)                 | -6833.9085  |
| 707  | Ax3 - Ax1 | 5.284286e-08 | D12 (Minocycline)                 | -13077.8281 |
| 709  | Ax5 - Ax1 | 1.277779e-03 | D12 (Minocycline)                 | -6939.8073  |
| 712  | Ax4 - Ax2 | 6.241677e-04 | D12 (Minocycline)                 | 6796.2470   |
| 714  | Ax6 - Ax2 | 1.482354e-03 | D12 (Minocycline)                 | 6729.5679   |
| 715  | Ax4 - Ax3 | 2.342226e-06 | D12 (Minocycline)                 | 13040.1667  |
| 717  | Ax6 - Ax3 | 1.491997e-05 | D12 (Minocycline)                 | 12973.4875  |
| 718  | Ax5 - Ax4 | 1.078187e-02 | D12 (Minocycline)                 | -6902.1458  |
| 720  | Ax6 - Ax5 | 1.669333e-02 | D12 (Minocycline)                 | 6835.4667   |
| 739  | Ax5 - Ax1 | 0.000000e+00 | E02 (Gly-Pro)                     | 9977.0069   |
| 740  | Ax6 - Ax1 | 0.000000e+00 | E02 (Gly-Pro)                     | 11289.9444  |
| 743  | Ax5 - Ax2 | 0.000000e+00 | E02 (Gly-Pro)                     | 9892.0536   |
| 744  | Ax6 - Ax2 | 0.000000e+00 | E02 (Gly-Pro)                     | 11204.9911  |
| 746  | Ax5 - Ax3 | 0.000000e+00 | E02 (Gly-Pro)                     | 10179.7187  |
| 747  | Ax6 - Ax3 | 0.000000e+00 | E02 (Gly-Pro)                     | 11492.6562  |
| 748  | Ax5 - Ax4 | 0.000000e+00 | E02 (Gly-Pro)                     | 9383.7604   |
| 749  | Ax6 - Ax4 | 0.000000e+00 | E02 (Gly-Pro)                     | 10696.6979  |
| 752  | Ax3 - Ax1 | 7.325594e-03 | E03 (L-Alanine)                   | 3203.0799   |
| 756  | Ax3 - Ax2 | 3.488617e-04 | E03 (L-Alanine)                   | 4434.0446   |
| 762  | Ax6 - Ax3 | 2.164407e-04 | E03 (L-Alanine)                   | -4731.6250  |
| 765  | Ax6 - Ax5 | 3.956553e-02 | E03 (L-Alanine)                   | -2699.4583  |
| 785  | Ax6 - Ax1 | 1.105835e-04 | E05 (L-Aspartic Acid)             | 3735.6899   |
| 789  | Ax6 - Ax2 | 1.295726e-02 | E05 (L-Aspartic Acid)             | 3277.9268   |
| 792  | Ax6 - Ax3 | 9.084223e-03 | E05 (L-Aspartic Acid)             | 4848.1812   |
| 794  | Ax6 - Ax4 | 2.105298e-02 | E05 (L-Aspartic Acid)             | 3229.5146   |
| 801  | Ax3 - Ax2 | 1.488507e-03 | E06 (L-Glutamic Acid)             | 3765.1563   |
| 802  | Ax4 - Ax2 | 3.224592e-02 | E06 (L-Glutamic Acid)             | 1983.4167   |
| 807  | Ax6 - Ax3 | 1.549068e-02 | E06 (L-Glutamic Acid)             | -3234.2938  |
| 813  | Ax4 - Ax1 | 1.180172e-09 | E07 (L-Histidine)                 | 7450.7622   |
| 814  | Ax5 - Ax1 | 4.742383e-04 | E07 (L-Histidine)                 | 6282.5851   |
| 815  | Ax6 - Ax1 | 9.888756e-13 | E07 (L-Histidine)                 | 9536.9101   |
| 817  | Ax4 - Ax2 | 1.296690e-09 | E07 (L-Histidine)                 | 9339.7307   |
| 818  | Ax5 - Ax2 | 3.209675e-05 | E07 (L-Histidine)                 | 8171.5536   |
| 819  | Ax6 - Ax2 | 2.877809e-12 | E07 (L-Histidine)                 | 11425.8786  |
| 820  | Ax4 - Ax3 | 1.598760e-03 | E07 (L-Histidine)                 | 7790.9271   |
| 821  | Ax5 - Ax3 | 3.394770e-02 | E07 (L-Histidine)                 | 6622.7500   |
| 822  | Ax6 - Ax3 | 4.253347e-05 | E07 (L-Histidine)                 | 9877.0750   |
| 842  | Ax3 - Ax1 | 8.813534e-03 | E09 (L-Serine)                    | 2909.2378   |
| 884  | Ax6 - Ax4 | 1.284992e-02 | E11 (Guanidine Hydrochloride)     | -2728.7542  |
| 887  | Ax3 - Ax1 | 4.627627e-03 | E12 (Niaproof)                    | -6119.8767  |
| 891  | Ax3 - Ax2 | 3.586907e-02 | E12 (Niaproof)                    | -5507.0313  |
| 895  | Ax4 - Ax3 | 1.687011e-03 | E12 (Niaproof)                    | 7418.2396   |
| 896  | Ax5 - Ax3 | 1.537923e-02 | E12 (Niaproof)                    | 6894.6979   |
| 897  | Ax6 - Ax3 | 1.876146e-02 | E12 (Niaproof)                    | 6180.1438   |
| 914  | Ax6 - Ax4 | 2.856123e-02 | F01 (Pectin)                      | -2269.4354  |
| 929  | Ax6 - Ax4 | 9.983826e-04 | F02 (D-Galacturonic Acid)         | -1747.8458  |
| 935  | Ax6 - Ax1 | 2.527683e-02 | F03 (L-Galactonic Acid-g-Lactone) | -1440.3767  |
| 939  | Ax6 - Ax2 | 1.374244e-02 | F03 (L-Galactonic Acid-g-Lactone) | -1881.0179  |
| 944  | Ax6 - Ax4 | 3.442240e-04 | F03 (L-Galactonic Acid-g-Lactone) | -2595.3646  |
| 947  | Ax3 - Ax1 | 1.981948e-03 | F04 (D-Gluconic Acid)             | 4730.7517   |
| 949  | Ax5 - Ax1 | 4.275801e-02 | F04 (D-Gluconic Acid)             | 2922.0226   |
| 951  | Ax3 - Ax2 | 2.674659e-02 | F04 (D-Gluconic Acid)             | 4125.6161   |
| 955  | Ax4 - Ax3 | 1.508796e-02 | F04 (D-Gluconic Acid)             | -4471.1979  |
| 965  | Ax6 - Ax1 | 4.881676e-02 | F05 (D-Glucuronic Acid)           | -893.7913   |
| 974  | Ax6 - Ax4 | 2.107920e-03 | F05 (D-Glucuronic Acid)           | -1534.2062  |
| 989  | Ax6 - Ax4 | 1.122511e-03 | F06 (Glucuronamide)               | -2133.6625  |
| 995  | Ax6 - Ax1 | 1.962862e-04 | F07 (Mucic Acid)                  | -4822.2597  |
| 999  | Ax6 - Ax2 | 2.762763e-04 | F07 (Mucic Acid)                  | -5795.0821  |
| 1004 | Ax6 - Ax4 | 6.793946e-04 | F07 (Mucic Acid)                  | -5679.7771  |
| 1022 | Ax3 - Ax1 | 9.740764e-03 | F09 (D-Saccharic Acid)            | 3486.3628   |
| 1025 | Ax6 - Ax1 | 0.000000e+00 | F09 (D-Saccharic Acid)            | -9493.9622  |
| 1029 | Ax6 - Ax2 | 0.000000e+00 | F09 (D-Saccharic Acid)            | -9951.8429  |
| 1032 | Ax6 - Ax3 | 0.000000e+00 | F09 (D-Saccharic Acid)            | -12980.3250 |
| 1034 | Ax6 - Ax4 | 0.000000e+00 | F09 (D-Saccharic Acid)            | -11042.8563 |
| 1035 | Ax6 - Ax5 | 0.000000e+00 | F09 (D-Saccharic Acid)            | -11022.2833 |
| 1064 | Ax6 - Ax4 | 2.279043e-02 | F11 (Tetrazolium Violet)          | -1097.5167  |

|      |           |              |                                  |             |
|------|-----------|--------------|----------------------------------|-------------|
| 1119 | Ax6 - Ax2 | 4.127134e-02 | G03 (D-Lactic Acid Methyl Ester) | -789.6839   |
| 1124 | Ax6 - Ax4 | 1.019538e-02 | G03 (D-Lactic Acid Methyl Ester) | -949.4458   |
| 1130 | Ax6 - Ax1 | 1.065427e-07 | G04 (L-Lactic Acid)              | -4733.1608  |
| 1133 | Ax5 - Ax2 | 7.517423e-03 | G04 (L-Lactic Acid)              | 3955.5565   |
| 1134 | Ax6 - Ax2 | 3.816310e-03 | G04 (L-Lactic Acid)              | -3553.6268  |
| 1137 | Ax6 - Ax3 | 1.988135e-05 | G04 (L-Lactic Acid)              | -6962.9750  |
| 1139 | Ax6 - Ax4 | 5.492458e-06 | G04 (L-Lactic Acid)              | -5264.3396  |
| 1140 | Ax6 - Ax5 | 1.480861e-06 | G04 (L-Lactic Acid)              | -7509.1833  |
| 1175 | Ax6 - Ax1 | 0.000000e+00 | G07 (D-Malic Acid)               | -10842.6969 |
| 1179 | Ax6 - Ax2 | 0.000000e+00 | G07 (D-Malic Acid)               | -9991.7750  |
| 1182 | Ax6 - Ax3 | 0.000000e+00 | G07 (D-Malic Acid)               | -12097.5875 |
| 1184 | Ax6 - Ax4 | 0.000000e+00 | G07 (D-Malic Acid)               | -11520.9833 |
| 1185 | Ax6 - Ax5 | 0.000000e+00 | G07 (D-Malic Acid)               | -11091.2750 |
| 1205 | Ax6 - Ax1 | 4.634296e-02 | G09 (Bromo-Succinic Acid)        | 1801.5490   |
| 1209 | Ax6 - Ax2 | 3.065268e-02 | G09 (Bromo-Succinic Acid)        | 2325.3161   |
| 1217 | Ax3 - Ax1 | 1.142895e-02 | G10 (Nalidixic Acid)             | -4296.2986  |
| 1218 | Ax4 - Ax1 | 4.016228e-02 | G10 (Nalidixic Acid)             | -2273.7569  |
| 1220 | Ax6 - Ax1 | 1.143290e-06 | G10 (Nalidixic Acid)             | -4728.4424  |
| 1224 | Ax6 - Ax2 | 7.303560e-03 | G10 (Nalidixic Acid)             | -3605.4250  |
| 1231 | Ax2 - Ax1 | 9.934547e-03 | G11 (Lithium Chloride)           | -3788.0139  |
| 1234 | Ax5 - Ax1 | 3.261184e-05 | G11 (Lithium Chloride)           | -7942.3264  |
| 1236 | Ax3 - Ax2 | 9.620386e-03 | G11 (Lithium Chloride)           | 7373.9063   |
| 1239 | Ax6 - Ax2 | 4.291073e-02 | G11 (Lithium Chloride)           | 4586.7250   |
| 1241 | Ax5 - Ax3 | 1.441401e-04 | G11 (Lithium Chloride)           | -11528.2187 |
| 1243 | Ax5 - Ax4 | 1.736738e-02 | G11 (Lithium Chloride)           | -6141.7917  |
| 1245 | Ax6 - Ax5 | 2.360336e-04 | G11 (Lithium Chloride)           | 8741.0375   |
| 1250 | Ax6 - Ax1 | 2.990879e-03 | G12 (Potassium Tellurite)        | -5091.0712  |
| 1263 | Ax4 - Ax1 | 3.822043e-02 | H01 (Tween 40)                   | 876.8073    |
| 1277 | Ax3 - Ax1 | 1.087496e-10 | H02 (g-Amino-n-Butyric Acid)     | 7491.7031   |
| 1280 | Ax6 - Ax1 | 2.862465e-10 | H02 (g-Amino-n-Butyric Acid)     | 4744.3656   |
| 1281 | Ax3 - Ax2 | 6.558964e-10 | H02 (g-Amino-n-Butyric Acid)     | 7774.0268   |
| 1284 | Ax6 - Ax2 | 5.182124e-08 | H02 (g-Amino-n-Butyric Acid)     | 5026.6893   |
| 1285 | Ax4 - Ax3 | 2.609634e-08 | H02 (g-Amino-n-Butyric Acid)     | -7515.0313  |
| 1286 | Ax5 - Ax3 | 3.942225e-06 | H02 (g-Amino-n-Butyric Acid)     | -6760.0625  |
| 1289 | Ax6 - Ax4 | 1.975029e-06 | H02 (g-Amino-n-Butyric Acid)     | 4767.6937   |
| 1290 | Ax6 - Ax5 | 1.424554e-03 | H02 (g-Amino-n-Butyric Acid)     | 4012.7250   |
| 1309 | Ax5 - Ax1 | 2.495324e-02 | H04 (b-Hydroxy-Butyric Acid)     | 2837.5087   |
| 1310 | Ax6 - Ax1 | 2.557003e-02 | H04 (b-Hydroxy-Butyric Acid)     | 2248.3670   |
| 1313 | Ax5 - Ax2 | 2.627254e-02 | H04 (b-Hydroxy-Butyric Acid)     | 3240.7560   |
| 1314 | Ax6 - Ax2 | 3.593978e-02 | H04 (b-Hydroxy-Butyric Acid)     | 2651.6143   |
| 1400 | Ax6 - Ax1 | 1.254185e-02 | H10 (Aztreonam)                  | -2626.1382  |
| 1404 | Ax6 - Ax2 | 1.962961e-03 | H10 (Aztreonam)                  | -3765.1089  |
| 1409 | Ax6 - Ax4 | 6.078472e-04 | H10 (Aztreonam)                  | -4221.5583  |
| 1410 | Ax6 - Ax5 | 3.860701e-03 | H10 (Aztreonam)                  | -4465.9958  |

#### 4.1. Two exemplary wells

In order to give a better insight into the summary of the **multcomp** statistics as shown above, here, the pairwise comparison of all groups Ax1 to Ax6 will be demonstrated in detail below for two exemplary wells.

The code below plots the curve kinetics of two exemplary wells, D09 and F09 (Figure 3).

```
R> xy_plot(achromobacter[,c("D09", "F09")], col = c("white", "grey", "blue", "black",
      "green", "orange", "red"),
  include = list("MLSTcluster"), lwd = 0.4,
  neg.ctrl = NULL, legend.fmt = list(space = "right"))
```

Apply **multcomp** statistics (Hothorn *et al.* 2008; Herberich *et al.* 2010) to the AUC curve parameter values from well **D09**. The stars indicate the level of statistical significance between pairwise comparison of groups.

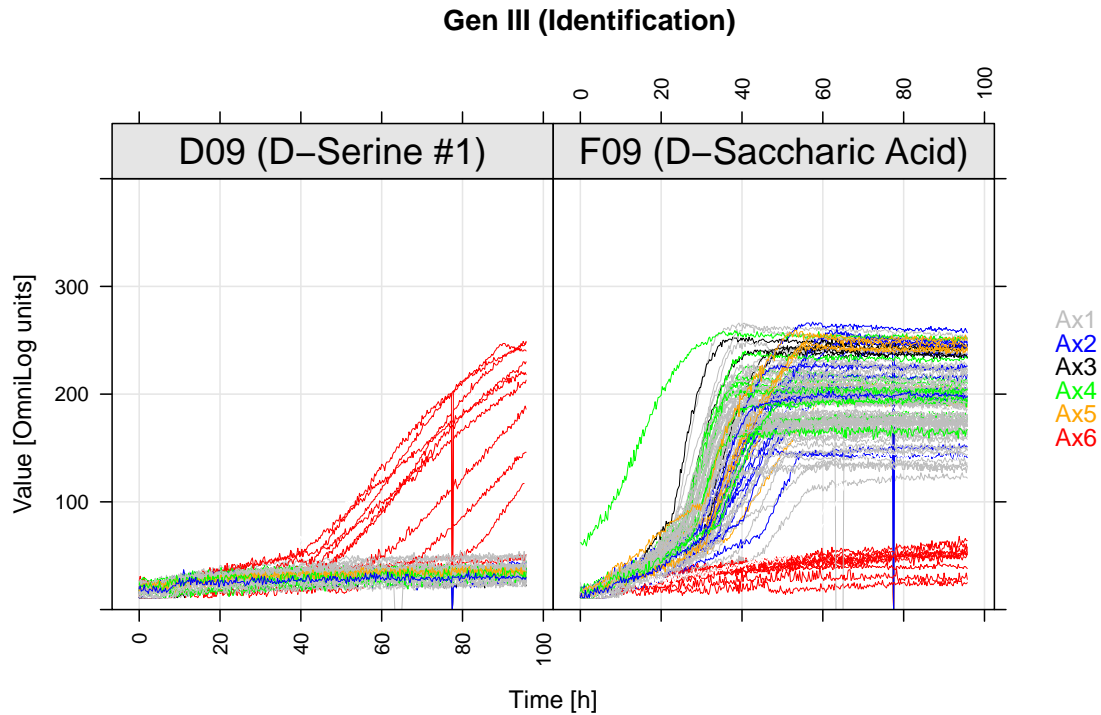

Figure 3: Curve kinetics of two selected wells.

```
R>achr1 <- subset(achr, query = list(MLSTcluster = "Ax_none"), invert = TRUE)
R> specificWellD09 <- opm_mcp(achr1[,,"D09"], model = ~ MLSTcluster,
  m.type = "aov", linfct = c(Tukey = 1), subset = "AUC")
R> mcp.summary <- summary(specificWellD09)
R> mcp.summary$model$call <- NULL # avoid some unnecessary output
R> mcp.summary
```

#### Simultaneous Tests for General Linear Hypotheses

##### Multiple Comparisons of Means: Tukey Contrasts

##### Linear Hypotheses:

|                | Estimate | Std. Error | t value | Pr(> t )   |
|----------------|----------|------------|---------|------------|
| Ax2 - Ax1 == 0 | -86.682  | 237.083    | -0.366  | 0.999      |
| Ax3 - Ax1 == 0 | -202.646 | 416.957    | -0.486  | 0.996      |
| Ax4 - Ax1 == 0 | 146.427  | 253.083    | 0.579   | 0.991      |
| Ax5 - Ax1 == 0 | 1.146    | 344.894    | 0.003   | 1.000      |
| Ax6 - Ax1 == 0 | 4292.067 | 273.919    | 15.669  | <1e-05 *** |
| Ax3 - Ax2 == 0 | -115.964 | 460.175    | -0.252  | 1.000      |
| Ax4 - Ax2 == 0 | 233.109  | 319.310    | 0.730   | 0.975      |
| Ax5 - Ax2 == 0 | 87.827   | 396.056    | 0.222   | 1.000      |
| Ax6 - Ax2 == 0 | 4378.748 | 336.064    | 13.029  | <1e-05 *** |
| Ax4 - Ax3 == 0 | 349.073  | 468.619    | 0.745   | 0.973      |
| Ax5 - Ax3 == 0 | 203.792  | 523.932    | 0.389   | 0.999      |
| Ax6 - Ax3 == 0 | 4494.712 | 480.192    | 9.360   | <1e-05 *** |
| Ax5 - Ax4 == 0 | -145.281 | 405.836    | -0.358  | 0.999      |
| Ax6 - Ax4 == 0 | 4145.640 | 347.537    | 11.929  | <1e-05 *** |
| Ax6 - Ax5 == 0 | 4290.921 | 419.146    | 10.237  | <1e-05 *** |

---  
 Signif. codes: 0 '\*\*\*' 0.001 '\*\*' 0.01 '\*' 0.05 '.' 0.1 ' ' 1  
 (Adjusted p values reported -- single-step method)

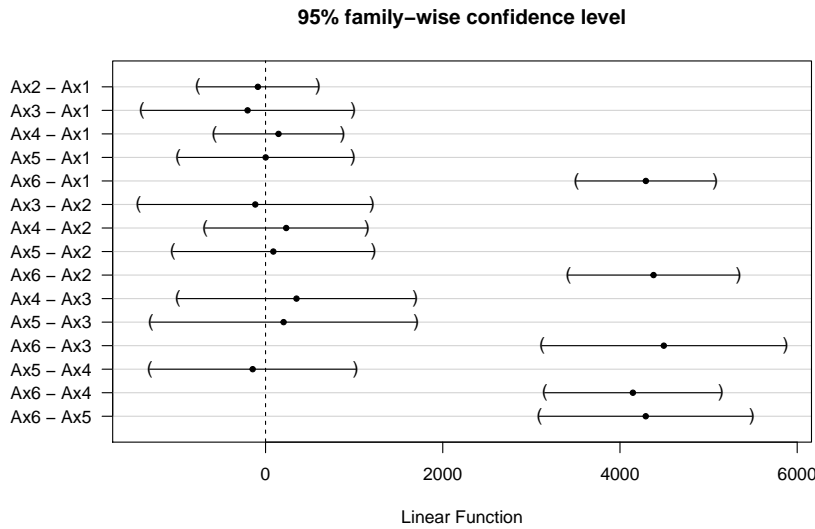

Figure 4: Graphical depiction of the results from the multiple comparison for well D09. On the y axis the performed comparisons are indicated as differences of the groups, determining which differences of means are computed. All pairwise comparisons are shown. The filled black circle indicates the point estimator of difference between the mean of groups. 95% confidence intervals are indicated by horizontal bars and parentheses. In pairwise comparisons, if the 95% confidence interval includes zero (dashed vertical line) there is no significant difference between the group means. Conversely, if zero is not included, a significant difference is indicated. Furthermore, the more distant the 95% confidence interval is from zero, the larger the biological effect size, i.e. the real difference between the groups.

The code below plots the results from the multiple comparison for Well D09 (Figure 4).

```
R> plot(specificWellD09)
```

Apply **multcomp** statistics (Hothorn *et al.* 2008; Herberich *et al.* 2010) to the AUC curve parameter values from well **F09**. The stars indicate the level of statistical significance between pairwise comparison of groups.

```
R> specificWellF09 <- opm_mcp(achr1[,,"F09"], model = ~ MLSTcluster,
                             m.type = "aov", linfct = c(Tukey = 1), subset = "AUC")
R> mcp.summary <- summary(specificWellF09)
R> mcp.summary$model$call <- NULL # avoid some unnecessary output
R> mcp.summary
```

Simultaneous Tests for General Linear Hypotheses

Multiple Comparisons of Means: Tukey Contrasts

Linear Hypotheses:

|                | Estimate | Std. Error | t value | Pr(> t )    |
|----------------|----------|------------|---------|-------------|
| Ax2 - Ax1 == 0 | 457.88   | 579.10     | 0.791   | 0.96467     |
| Ax3 - Ax1 == 0 | 3486.36  | 1018.46    | 3.423   | 0.00984 **  |
| Ax4 - Ax1 == 0 | 1548.89  | 618.18     | 2.506   | 0.12031     |
| Ax5 - Ax1 == 0 | 1528.32  | 842.44     | 1.814   | 0.43690     |
| Ax6 - Ax1 == 0 | -9493.96 | 669.07     | -14.190 | < 0.001 *** |

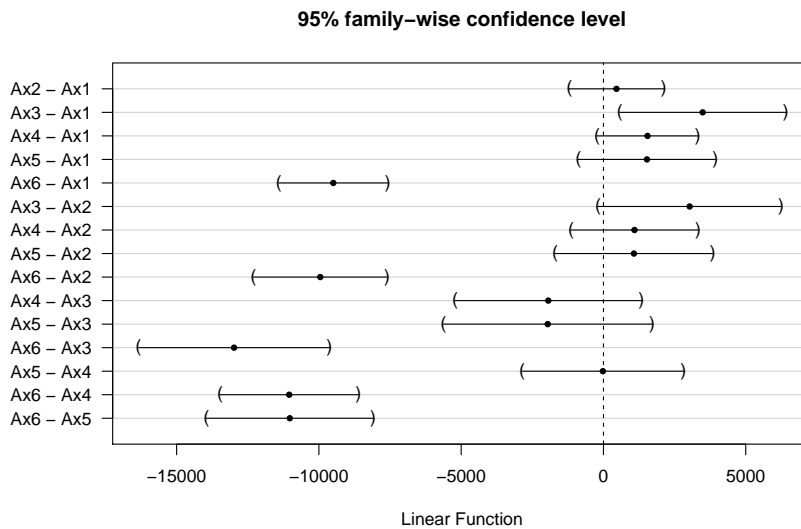

Figure 5: Graphical depiction of the results from the multiple comparison for well F09.

```

Ax3 - Ax2 == 0  3028.48  1124.02  2.694  0.07674 .
Ax4 - Ax2 == 0  1091.01  779.94  1.399  0.70710
Ax5 - Ax2 == 0  1070.44  967.40  1.107  0.86559
Ax6 - Ax2 == 0 -9951.84  820.87 -12.124 < 0.001 ***
Ax4 - Ax3 == 0 -1937.47  1144.65 -1.693  0.51535
Ax5 - Ax3 == 0 -1958.04  1279.75 -1.530  0.62277
Ax6 - Ax3 == 0 -12980.32  1172.91 -11.067 < 0.001 ***
Ax5 - Ax4 == 0   -20.57  991.29 -0.021  1.00000
Ax6 - Ax4 == 0 -11042.86  848.89 -13.009 < 0.001 ***
Ax6 - Ax5 == 0 -11022.28  1023.80 -10.766 < 0.001 ***
---
Signif. codes:  0 '***' 0.001 '**' 0.01 '*' 0.05 '.' 0.1 ' ' 1
(Adjusted p values reported -- single-step method)

```

The code below plots the results from the multiple comparison for Well F09 (Figure 5).

```
R> plot(specificWellF09)
```

## References

- Bochner B (2009). "Global Phenotypic Characterization of Bacteria." *FEMS Microbiological Reviews*, **33**, 191–205.
- Bochner B, Gadzinski P, Panomitros E (2001). "Phenotype MicroArrays for High Throughput Phenotypic Testing and Assay of Gene Function." *Genome Research*, **11**, 1246–1255.
- Borcard D, Legendre P, Gillet F (2011). *Numerical Ecology with R*. Springer, New York. ISBN 9781441979759 1441979751. URL [http://www.worldcat.org/search?qt=worldcat\\_org\\_all&q=9781441979759](http://www.worldcat.org/search?qt=worldcat_org_all&q=9781441979759).
- Herberich E, Sikorski J, Hothorn T (2010). "A Robust Procedure for Comparing Multiple Means under Heteroscedasticity in Unbalanced Designs." *PLoS ONE*, **5**(3), e9788.

- Hothorn T, Bretz F, Westfall P (2008). “Simultaneous Inference in General Parametric Models.” *Biometrical Journal*, **50**, 346–363. See vignette(“generalsiminf”, package = “multcomp”).
- Legendre P, Legendre L (1998). *Numerical Ecology*. Developments in Environmental Modelling. Elsevier Science. ISBN 9780080537870. URL <http://books.google.de/books?id=KBoHuoNR05MC>.
- Leisch F (2002). “Sweave: Dynamic Generation of Statistical Reports Using Literate Data Analysis.” In W Härdle, B Rönz (eds.), *Compstat 2002 — Proceedings in Computational Statistics*, pp. 575–580. Physica Verlag, Heidelberg. ISBN 3-7908-1517-9, URL <http://www.stat.uni-muenchen.de/~leisch/Sweave>.
- Vaas L, Sikorski J, Michael V, Göker M, Klenk H (2012). “Visualization and Curve Parameter Estimation Strategies for Efficient Exploration of Phenotype MicroArray Kinetics.” *PLoS ONE*, **7**, e34846. See vignette(“opm.pdf”, package = “opm”), URL <http://cran.r-project.org/web/packages/opm/vignettes/opm.pdf>.
- Vaas LAI, Sikorski J, Hofner B, Fiebig A, Buddruhs N, Klenk HP, Göker M (2013). “opm: an R package for analysing OmniLog phenotype microarray data.” *Bioinformatics*, **29**(14), 1823–1824. doi:10.1093/bioinformatics/btt291. <http://bioinformatics.oxfordjournals.org/content/29/14/1823.full.pdf+html>, URL <http://bioinformatics.oxfordjournals.org/content/29/14/1823.abstract>.

**Affiliation:**

Johannes Sikorski  
Leibniz Institute DSMZ – German Collection of Microorganisms and Cell Cultures  
Braunschweig

URL: [www.dsmz.de](http://www.dsmz.de)
