# Supplementary material for: Isolation and Characterization of Numerous Novel Phages Targeting Diverse Strains of the Ubiquitous and Opportunistic Pathogen Achromobacter xylosoxidans
Source: PLoS One. 2014 Jan 22;9(1):e86935. doi: 10.1371/journal.pone.0086935 (PMC3899368; doi:10.1371/journal.pone.0086935)
Supplement: Table S1 — Metadata of all Achromobacter strains of this study. (XLSX) [file pone.0086935.s003.xlsx]

## Sheet: Tabelle1
Genus	Species	Strain	Year of isolation	Geographic origin (Country)	Geographic origin (City)	Kind of Source	Isolated from
Achromobacter	xylosoxidans	DSM 11852	1991	Austria	unknown	environmental	soil
Achromobacter	xylosoxidans	DSM 2402	unknown	Japan	unknown	medical	ear discharge
Achromobacter	xylosoxidans	DSM 6388	unknown	Germany	Goettingen	unknown	unknown
Achromobacter	xylosoxidans	83-190	1983	France	Paris	unknown	unknown
Achromobacter	xylosoxidans	CCUG 41513	1998	Austria	Wien	medical	sputum
Achromobacter	xylosoxidans	CCUG 42363	1999	Sweden	Goeteborg	medical	sputum
Achromobacter	xylosoxidans	CCUG 45179	2001	Austria	Wien	medical	sputum
Achromobacter	xylosoxidans	CCUG 48135	2003	Sweden	Goeteborg	medical	sputum
Achromobacter	xylosoxidans	CCUG 48331	2003	Sweden	Goeteborg	medical	sputum
Achromobacter	xylosoxidans	CCUG 48386	2003	Sweden	Goeteborg	medical	sputum
Achromobacter	xylosoxidans	CCUG 48584	2003	Sweden	Goeteborg	medical	sputum
Achromobacter	xylosoxidans	CCUG 48684	2004	Sweden	Goeteborg	medical	sputum
Achromobacter	xylosoxidans	CCUG 56600	2008	Sweden	Goeteborg	medical	sputum
Achromobacter	xylosoxidans	CCUG 367	1964	Denmark	Copenhagen	unknown	unknown
Achromobacter	xylosoxidans	CCUG 716	1970	Sweden	Goeteborg	unknown	unknown
Achromobacter	xylosoxidans	CCUG 723	1961	France	Paris	unknown	unknown
Achromobacter	xylosoxidans	CCUG 1142	1971	Sweden	Goeteborg	medical	ear discharge
Achromobacter	xylosoxidans	CCUG 1205	1970	Spain	unknown	medical	spinal fluid
Achromobacter	xylosoxidans	CCUG 1668	1972	Sweden	Goeteborg	medical	ear discharge
Achromobacter	xylosoxidans	CCUG 1869	1972	unknown	unknown	unknown	unknown
Achromobacter	xylosoxidans	CCUG 2160	unknown	Germany	unknown	medical	wound
Achromobacter	xylosoxidans	CCUG 2203	1973	Sweden	Goeteborg	medical	ear discharge
Achromobacter	ruhlandii	CCUG 2349	1950	England	Manchester	medical	blood
Achromobacter	xylosoxidans	CCUG 11894	1982	Sweden	Goeteborg	medical	blood
Achromobacter	xylosoxidans	CCUG 14603	1983	France	Lyon	environmental	water
Achromobacter	xylosoxidans	CCUG 14608	1983	France	Lyon	medical	nosocomial
Achromobacter	denitrificans	CCUG 27767	1991	Sweden	Stockholm	unknown	unknown
Achromobacter	xylosoxidans	CCUG 33068	1994	Sweden	Falun	medical	sputum
Achromobacter	xylosoxidans	CCUG 42034	1999	Sweden	Goeteborg	medical	urine
Achromobacter	xylosoxidans	CCUG 44552	2000	Sweden	Goeteborg	medical	sputum
Achromobacter	xylosoxidans	CCUG 47074	2002	Sweden	Goeteborg	medical	sputum
Achromobacter	sp.	CCUG 47723	2003	Ireland	Dublin	medical	unknown
Achromobacter	xylosoxidans	CCUG 52128	2005	Sweden	unknown	environmental	unknown
Achromobacter	xylosoxidans	CCUG 53197	2006	Sweden	Goeteborg	medical	sputum
Achromobacter	xylosoxidans	CCUG 53665	2006	Sweden	Goeteborg	medical	sputum
Achromobacter	xylosoxidans	CCUG 54610	2007	Sweden	Goeteborg	medical	eye
Achromobacter	xylosoxidans	CCUG 57172	2008	Sweden	Goeteborg	medical	sputum
Achromobacter	xylosoxidans	CCUG 59527	2010	Sweden	Goeteborg	medical	sputum
Achromobacter	xylosoxidans	CCUG 59837	2010	Sweden	Goeteborg	medical	trachea
Achromobacter	xylosoxidans	CCUG 61615	2011	Sweden	Goeteborg	medical	blood
Achromobacter	xylosoxidans	CCM 2981	unknown	unknown	unknown	unknown	unknown
Achromobacter	xylosoxidans	CCM 2982	unknown	unknown	unknown	unknown	unknown
Achromobacter	xylosoxidans	CCM 2983	unknown	France	unknown	medical	urine
Achromobacter	xylosoxidans	LMG 3440	unknown	France	unknown	medical	sputum
Achromobacter	denitrificans	LMG 3414	unknown	unknown	unknown	unknown	unknown
Achromobacter	xylosoxidans	LMG 1865	unknown	Japan	unknown	environmental	soil
Achromobacter	ruhlandii	LMG 3328	unknown	France	unknown	medical	blood
Achromobacter	xylosoxidans	LMG 1862	unknown	Denmark	unknown	medical	spinal fluid
Achromobacter	ruhlandii	LMG 1864	unknown	Japan	unknown	medical	ear discharge
Achromobacter	xylosoxidans	LMG 3420	unknown	Japan	unknown	medical	ear discharge
Achromobacter	xylosoxidans	LMG 3461	unknown	Denmark	unknown	medical	ear discharge
Achromobacter	xylosoxidans	LMG 3463	unknown	Denmark	unknown	medical	spinal fluid
Achromobacter	xylosoxidans	LMG 3464	unknown	Denmark	unknown	environmental	water
Achromobacter	xylosoxidans	LMG 3465	unknown	Denmark	unknown	environmental	water
Achromobacter	xylosoxidans	LMG 3466	unknown	Denmark	unknown	medical	unknown
Achromobacter	xylosoxidans	LMG 7050	unknown	Wales	unknown	medical	blood
Achromobacter	xylosoxidans	LMG 20155	unknown	Philippines	Jalajala	environmental	unknown
Achromobacter	xylosoxidans	LMG 7054	unknown	England	unknown	environmental	unknown
Achromobacter	xylosoxidans	LMG 7053	unknown	Scotland	unknown	medical	wound
Achromobacter	xylosoxidans	LMG 7052	unknown	England	unknown	medical	sputum
Achromobacter	xylosoxidans	LMG 7051	unknown	England	unknown	medical	blood
